# Supplementary material for: Distinct Assemblies of Heterodimeric Cytokine Receptors Govern Stemness Programs in Leukemia
Source: PubMed Central journal article supplement — Cancer Discov. 2023 May 16;13(8):1922–47. doi: 10.1158/2159-8290.CD-22-1396 (PMC10401075; doi:10.1158/2159-8290.cd-22-1396), 2023-05-16
Supplement: cd-22-1396_figure_s3_suppsf3.pdf [file cd-22-1396_figure_s3_suppsf3.pdf]

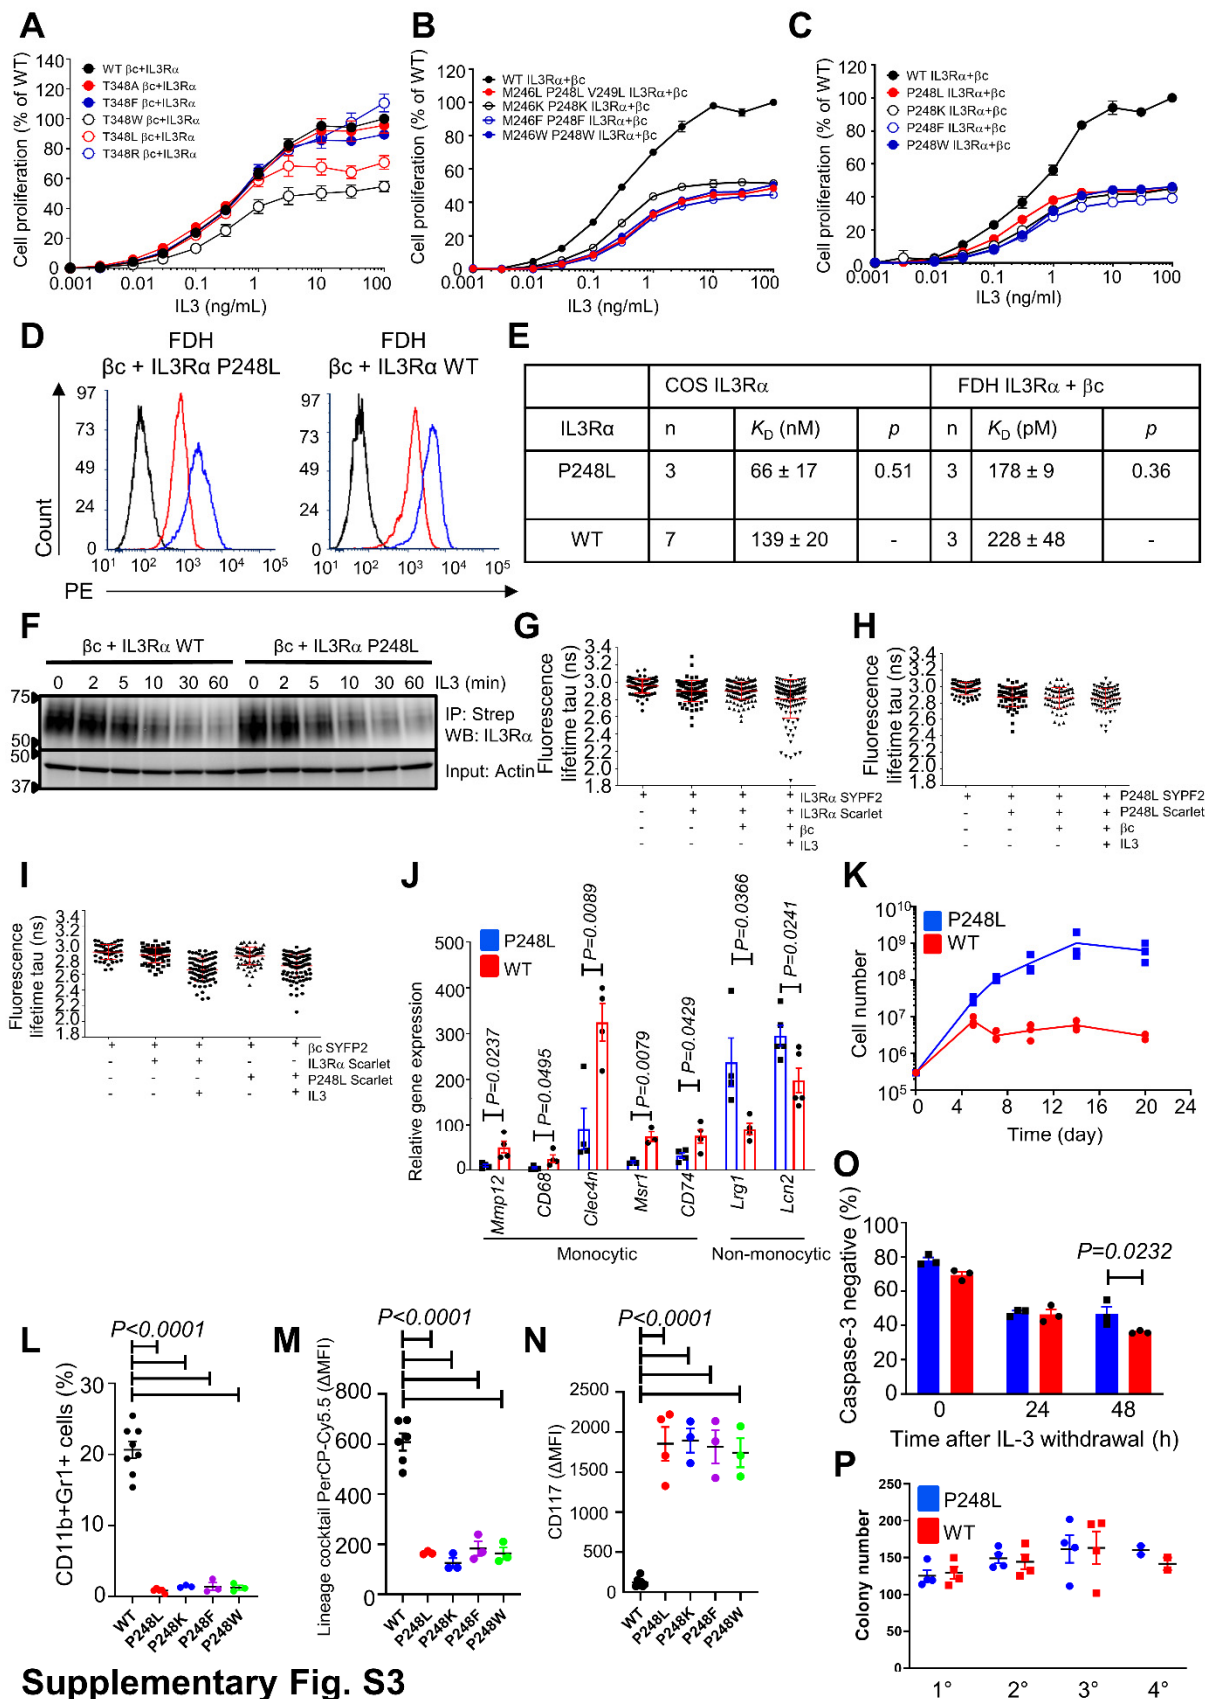

Supplementary Fig. S3

**Supplementary Figure S3. IL3R $\alpha$  P248 at the IL3R assembly interface is critical for cell differentiation.** **A, B, C**, IL3 induced proliferation of FDH cells expressing: **A**, IL3R $\alpha$  and  $\beta$ c WT (black filled circle) or  $\beta$ c mutants of the “assembly interface”, T348A (red filled circle), T348F (blue filled circle), T348W (black open circle), T348L (red open circle) and T348R (blue open circle); **B**,  $\beta$ c and IL3R $\alpha$  WT (black filled circle) or IL3R $\alpha$  mutants of the “assembly interface”, M246K/P248K (black open circle), M246W/P248W (blue filled circle), M246F/P248F (blue open circle) or M246L/P248L/V249L (red filled circle); **C**,  $\beta$ c and IL3R $\alpha$  WT (black filled circle) or IL3R $\alpha$  P248 mutants, P248K (black open circle), P248W (blue filled circle), P248F (blue open circle) or P248L (red filled circle). Proliferation of FDH cells expressing IL3R $\alpha$  WT or mutant is normalized to the maximum proliferation of FDH cells expressing WT IL3R $\alpha$  and  $\beta$ c in 100 ng/mL IL3 for 48 hours. Data are the mean of triplicate determinations from a representative experiment  $\pm$  standard deviation of the mean (SD). Similar results were obtained in 3 independent experiments. **D**, Flow cytometric analysis of cell surface  $\beta$ c and IL3R $\alpha$  in FDH cells expressing  $\beta$ c and IL3R $\alpha$  P248L or WT. Representative histograms are shown with IL3R $\alpha$  (blue),  $\beta$ c (red) and isotype control (black). **E**, The binding affinity of IL3 for IL3R $\alpha$  WT or IL3R $\alpha$  P248L in the absence or presence of  $\beta$ c was measured in saturation binding assays using radio-iodinated IL3 and indicated as  $K_D \pm$  standard error of the mean (SEM). *P* values are expressed relative to IL3R $\alpha$  WT in respective cell lines. **F**, Stability of IL3R $\alpha$  P248L compared to IL3R $\alpha$  WT at the cell surface as assessed by biotinylation of all cell surface proteins followed by streptavidin (strep) pulldown enrichment and immunoblotting of pulldowns for IL3R $\alpha$ . **G**, Raw IL3R $\alpha$ -IL3R $\alpha$ ' FLIM data from a representative experiment (of *n*=4 independent experiments) with cells expressing IL3R $\alpha$ -mScarlet-I or IL3R $\alpha$ -SYPF2 fusion proteins and  $\beta$ c. FLIM donor lifetimes were converted into %FRET efficiencies (shown in Fig. 2D, 2E) as indicated in Methods. **H**, as for (**G**) but for IL3R $\alpha$  P248L. **I**, Raw IL3R $\alpha$ - $\beta$ c FLIM data from a representative experiment (of *n*=3 independent experiments) with cells expressing

IL3R $\alpha$ -mScarlet-I or IL3R $\alpha$  P248L-mScarlet-I and  $\beta$ c-SYFP2 fusion proteins. **J**, Expression of monocytic differentiation genes in FDH cells after 5 days in IL3 normalized to RPLP0 expression. n=4 independent experiments. Blue: IL3R $\alpha$  P248L (hexamer); red: IL3R $\alpha$  WT (dodecamer). **K**, Cumulative number of FDH cells cultured with IL3 quantified at specific time points up to 20 days. The cell number from n=3 independent experiments are shown at each time point and the connecting line indicates the mean from independent experiments. **L, M, N**, Flow cytometric analysis of %CD11b+Gr1+ (**L**), mature lineage cocktail (**M**) and CD117 expression (**N**) in FDH cells expressing  $\beta$ c and various IL3R $\alpha$  P248 mutants (n=3). **O, P**, Fetal liver cells from  $\beta$ c<sup>-/-</sup> $\beta$ IL3<sup>-/-</sup> mice were transduced to express  $\beta$ c and IL3R $\alpha$  P248L (hexamer, blue) or WT (dodecamer, red) and assessed for % caspase-3 negative cells after IL3 withdrawal (n=3) (**O**) and serial replating colony numbers in cytokine cocktail (n=3) (**P**).
