# Supplementary material for: Distinct Assemblies of Heterodimeric Cytokine Receptors Govern Stemness Programs in Leukemia
Source: PubMed Central journal article supplement — Cancer Discov. 2023 May 16;13(8):1922–47. doi: 10.1158/2159-8290.CD-22-1396 (PMC10401075; doi:10.1158/2159-8290.cd-22-1396), 2023-05-16
Supplement: cd-22-1396_figure_s4_suppsf4.pdf [file cd-22-1396_figure_s4_suppsf4.pdf]

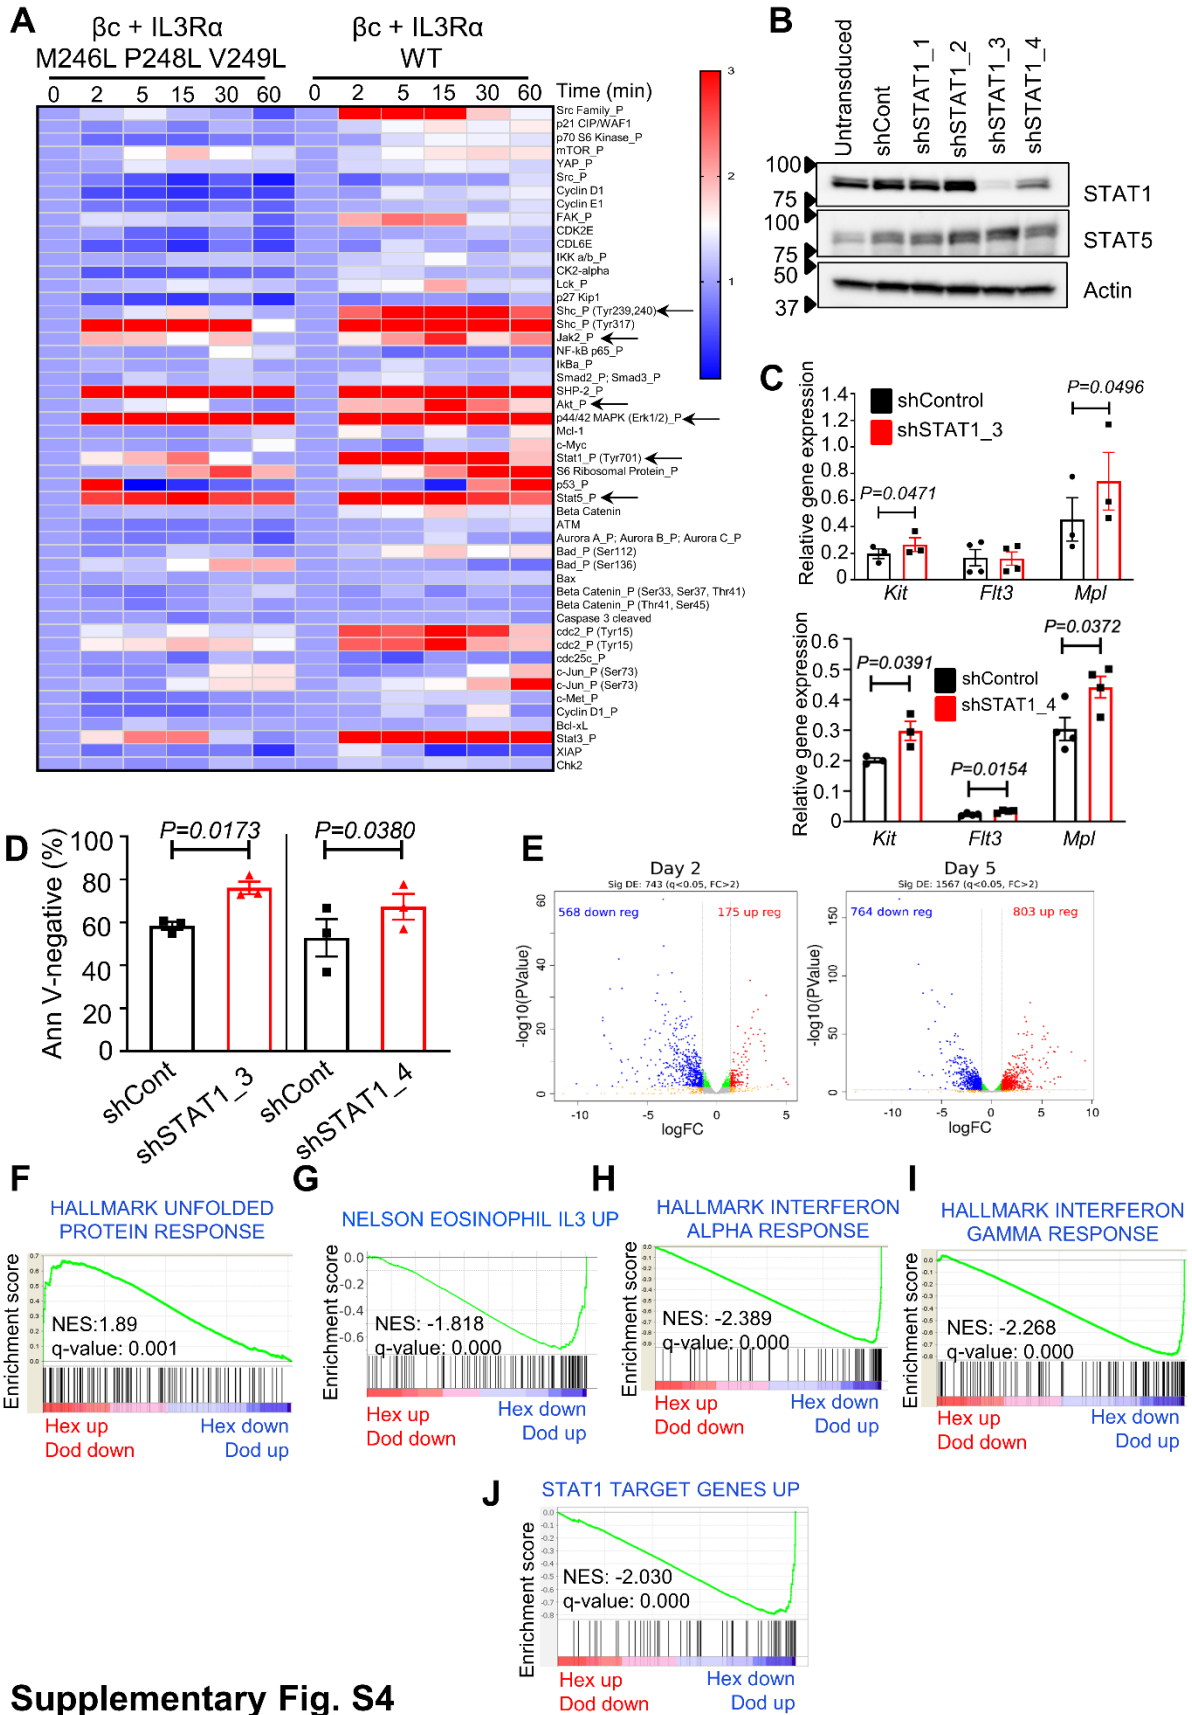

Supplementary Fig. S4

**Supplementary Figure S4. The IL3R dodecamer activates STAT1 to induce cell differentiation.** **A**, Heat map representation of protein levels in lysates from FDH cells expressing  $\beta c$  and IL3R $\alpha$  M246L/P248L/V249L or WT, after stimulation with 100 ng/mL IL3 for 0 to 60 minutes, as determined by RPPA. The levels of each protein are normalized to Time 0 for the respective cell line and presented using a red to blue (highest to lowest) color gradient. Targets indicated by arrows were validated subsequently with immunoblotting and shown in Fig. 4A and 4E. **B**, Representative immunoblot of STAT1 and STAT5 protein expression after independent STAT1 shRNA knockdown in FDH cells expressing  $\beta c$  and IL3R $\alpha$  WT. **C**, Expression of genes associated with stem and progenitor cells in FDH cells expressing  $\beta c$  and IL3R $\alpha$  WT transduced with lentivirus encoding Control (shCont) or STAT1 (shSTAT1\_3 or shSTAT1\_4) shRNA after treatment with IL3 for 2 days normalized to *RPLP0* expression (n=3-4). **D**, Survival of FDH cells expressing  $\beta c$  and IL3R $\alpha$  WT assessed by %Annexin V (Ann V) negative staining after STAT1 shRNA knockdown and following IL3 withdrawal (n=3). **E**, Number of differentially expressed genes between cells expressing  $\beta c$  and IL3R $\alpha$  P248L (IL3R hexamer) vs.  $\beta c$  and IL3R $\alpha$  WT (IL3R dodecamer) after 2 and 5 days of IL3 treatment.  $q < 0.05$ , fold change  $> 2$ . **F**, GSEA showing gene sets associated with unfolded protein response are enriched in genes upregulated in cells expressing IL3R hexamer after 5 days of IL3 treatment. **G**, GSEA showing that expression of genes associated with IL3 responses in differentiated human eosinophils is downregulated in cells expressing IL3R hexamer. **H**, **I**, GSEA showing gene sets associated with the IFN $\alpha$  (**H**) and IFN $\gamma$  response (**I**) are downregulated in FDH cells expressing IL3R hexamer after 5 days of IL3 treatment. **J**, GSEA plot showing negative enrichment of STAT1 target genes (55) in FDH cells expressing IL3R hexamer.
