# Supplementary material for: Distinct Assemblies of Heterodimeric Cytokine Receptors Govern Stemness Programs in Leukemia
Source: PubMed Central journal article supplement — Cancer Discov. 2023 May 16;13(8):1922–47. doi: 10.1158/2159-8290.CD-22-1396 (PMC10401075; doi:10.1158/2159-8290.cd-22-1396), 2023-05-16
Supplement: cd-22-1396_figure_s6_suppsf6.pdf [file cd-22-1396_figure_s6_suppsf6.pdf]

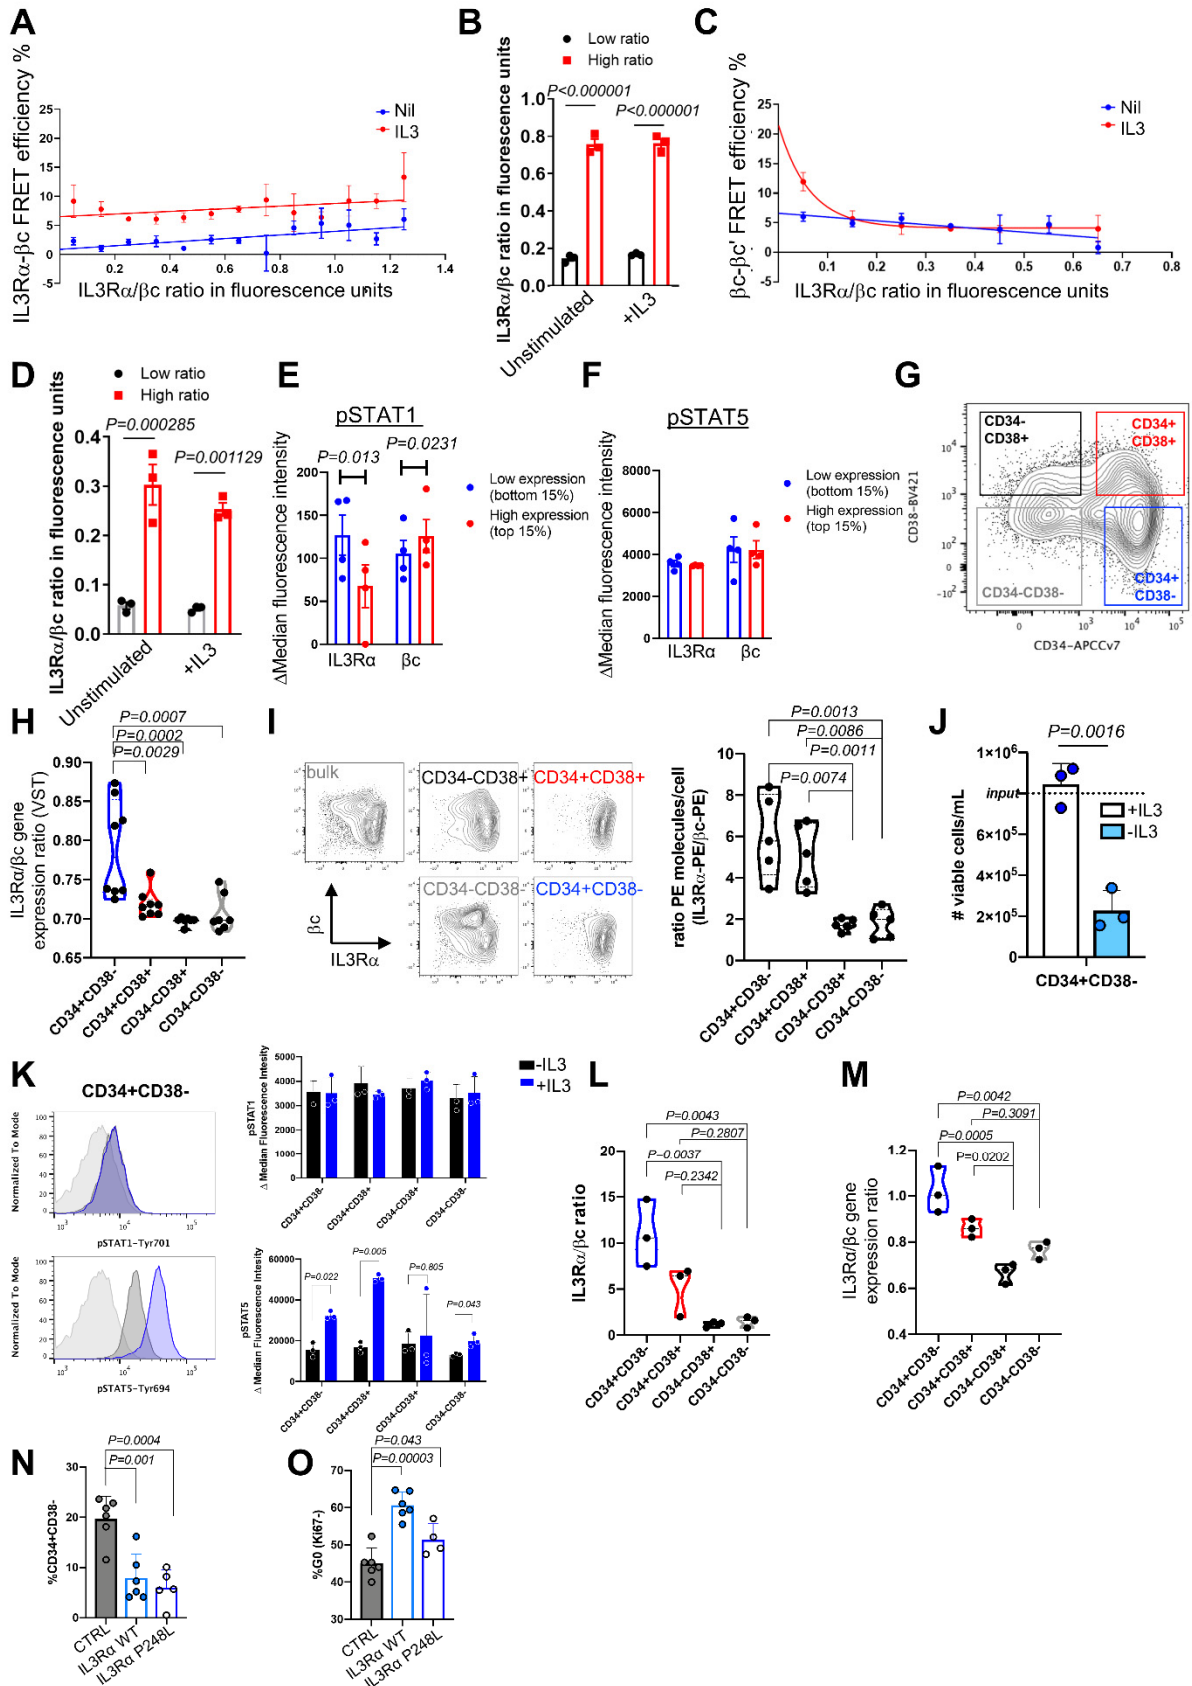

Supplementary Fig. S6

**Supplementary Figure S6. Increasing IL3R $\alpha$ / $\beta$ c ratios lead to hexameric receptor assembly and augmented quiescence.** **A**, %IL3R $\alpha$ - $\beta$ c FRET efficiency shown based on binned IL3R $\alpha$ / $\beta$ c expression ratios in fluorescence units. Each point is the mean of n=3 independent experiments. **B**, IL3R $\alpha$ / $\beta$ c ratio in fluorescence units in high and low ratio groups for IL3R $\alpha$ - $\beta$ c FRET experiments. Each point is the mean of n=3 independent experiments. **C**, % $\beta$ c- $\beta$ c' FRET efficiency shown based on binned IL3R $\alpha$ / $\beta$ c expression ratios in fluorescence units. Each point is the mean of n=3 independent experiments. **D**, IL3R $\alpha$ / $\beta$ c ratio in fluorescence units in high and low ratio groups for  $\beta$ c- $\beta$ c' FRET experiments. Each point is the mean of n=3 independent experiments. **E, F**, Flow cytometric analysis of phosphorylated STAT1 (**E**) and STAT5 (**F**) signaling in FDH cells expressing  $\beta$ c and IL3R $\alpha$  WT stratified on high vs. low IL3R $\alpha$  and  $\beta$ c cell surface expression levels upon IL3 stimulation.  $\Delta$ MFI: stimulated minus unstimulated median fluorescence intensity. **G-I**, The CD34 vs. CD38 defined subpopulations of OCI-AML22 (**G**) were assessed for IL3R $\alpha$ / $\beta$ c ratio (by RNA-seq, n=8 combined freshly thawed and various culture time points) (**H**) and IL3R $\alpha$ / $\beta$ c ratio by flow cytometric analysis of IL3R $\alpha$  and  $\beta$ c expression on the cell surface of the CD34/CD38 defined subfractions using Quantibrite assay (**I**). **J**, IL3 dependency of the sorted CD34+CD38- LSC fraction from OCI-AML22 according to cell counts after 7 days of culture +/- IL3. **K**, Phosphorylation of STAT-Tyr701 and STAT5-Tyr694 in the four sorted OCI-AML22 fractions delineated by CD34 and CD38 expression was assessed by Phosflow analysis upon 30 minutes of IL3 restimulation after 40 hours IL3 withdrawal (n=3). **L**, OCI-AML8227 cells were subjected to CD34, CD38 staining and via Quantibrite assay, surface abundance of either IL3R $\alpha$  (CD123) or  $\beta$ c (CD131) was quantified by flow cytometry to determine IL3R $\alpha$ / $\beta$ c protein surface ratio of the individual fractions delineated by CD34 and CD38 expression (n=3). **M**, IL3R $\alpha$  and  $\beta$ c transcript expression across the CD34/CD38 hierarchy of OCI-AML8227 according to RNA-seq. **N**, and **O**, Purified CD34+CD38- OCI-AML8227 were

transduced with control, IL3R $\alpha$  WT and IL3R $\alpha$  P248L vectors and after 2 weeks %CD34<sup>+</sup>CD38<sup>-</sup> was assessed (**N**) and BFP<sup>+</sup>CD34<sup>+</sup>CD38<sup>-</sup> cells were sorted and subjected to cell cycle analysis (**O**; 5-6 individual transductions, 2 independent experiments).
